1 **Comparative genomics guides elucidation of vitamin B12 biosynthesis in novel human**  
2 **associated *Akkermansia***

3

4 Nina Kirmiz<sup>1</sup>, Kadir Galindo<sup>1</sup>, Karissa L. Cross<sup>2,3</sup>, Estefani Luna<sup>1</sup>, Nicholas Rhoades<sup>1,4</sup>, Mircea  
5 Podar<sup>2,3</sup>, and Gilberto E. Flores<sup>1\*</sup>

6

7 <sup>1</sup>Department of Biology, California State University, Northridge, CA 91330, United States.

8 <sup>2</sup>Biosciences Division, Oak Ridge National Laboratory, Oak Ridge, TN 37831, United States.

9 <sup>3</sup>Microbiology Department, University of Tennessee Knoxville, Knoxville TN

10 <sup>4</sup>Department of Molecular Biology and Biochemistry, University of California, Irvine, CA  
11 92697, United States.

12

13 \*Corresponding author: Gilberto E. Flores

14 Department of Biology

15 California State University, Northridge

16 18111 Nordhoff Street

17 Northridge, CA 91330-8303

18 Phone: +1 (818) 677-4276

19 Email: [gilberto.flores@csun.edu](mailto:gilberto.flores@csun.edu)

20 [nina.kirmiz@csun.edu](mailto:nina.kirmiz@csun.edu), [kadir.galindo.150@my.csun.edu](mailto:kadir.galindo.150@my.csun.edu), [crosskl@ornl.gov](mailto:crosskl@ornl.gov),

21 [estefani.luna.438@my.csun.edu](mailto:estefani.luna.438@my.csun.edu), [rhoadesn@uci.edu](mailto:rhoadesn@uci.edu), [podarm@ornl.gov](mailto:podarm@ornl.gov)

## 22 **ABSTRACT**

23 **Background:** *Akkermansia muciniphila* is a mucin-degrading bacterium found in the gut of most  
24 healthy humans and is considered a ‘next-generation probiotic.’ However, knowledge of the  
25 genomic and physiological diversity of human associated *Akkermansia* is limited, as only one  
26 species has been formally described.

27 **Results:** To begin to fill this knowledge gap, we reconstructed 35 high-quality metagenome  
28 assembled genomes from children and combined them with 40 other publicly available genomes  
29 from adults and mice for comparative genomic analysis. We identified at least four species-level  
30 phylogroups (AmI-AmIV) with distinct functional potentials. Most notably, we identified the  
31 presence of putative cobalamin (vitamin B12) biosynthesis genes within the AmII (n=26/28) and  
32 AmIII (n=2/2) phylogroups. To test these predictions, 10 novel strains of *Akkermansia* were  
33 isolated from adults and screened for essential vitamin B12 biosynthesis genes via PCR. Two  
34 strains of the AmII phylogroup were positive for the presence of vitamin B12 biosynthesis genes,  
35 while all AmI strains, including the type strain *A. muciniphila* Muc<sup>T</sup>, were negative. To  
36 demonstrate vitamin B12 biosynthesis, we measured the production of acetate, succinate, and  
37 propionate in the presence and absence of vitamin supplementation in representative strains of  
38 the AmI and AmII phylogroups since cobalamin is a cofactor in propionate metabolism. Results  
39 show that the *Akkermansia* AmII strain produced acetate and propionate in the absence of  
40 supplementation, which is indicative of *de novo* vitamin B12 biosynthesis. In contrast, acetate  
41 and succinate were the main fermentation products for the AmI strains when vitamin B12 was  
42 not supplied in the culture medium.

43 **Conclusions:** We identified *Akkermansia* strains as potentially important vitamin B12  
44 biosynthetic bacteria in the human gut. This novel physiological trait of human associated

45 *Akkermansia* may impact how these bacteria interact with the human host and other members of  
46 the human gut microbiome.

47

48 **KEYWORDS:** *Akkermansia*, intestinal bacteria, vitamin B12, human gut microbiome,  
49 probiotics

50

## 51 **BACKGROUND**

52 *Akkermansia muciniphila* is a mucin degrading, gram-negative intestinal bacterium  
53 widely present in the human population, typically at 1 to 4% relative abundance [1, 2]. A number  
54 of studies in humans [3-5] and rodents [6-8] have found positive associations between its  
55 abundance and intestinal health, suggesting that *Akkermansia* may be a beneficial member of the  
56 gut microbiome and could be used as a biomarker of a healthy gut [9-11]. However, despite a  
57 diversity of phylotypes being reported by previous sequence-based studies, *A. muciniphila* Muc<sup>T</sup>  
58 (ATCC BAA-835) represents the sole described species of the Verrucomicrobia phylum  
59 associated with humans [2, 12, 13]. Therefore, before we can fully assess the health potential of  
60 human associated *Akkermansia*, a comprehensive understanding of the genomic and  
61 physiological diversity of this lineage is needed.

62 Recently, a pangenomic study that included 33 new isolates from adults and 6 from  
63 laboratory mice provided insights into the population structure and evolutionary history of the  
64 *Akkermansia* lineage [14]. Specifically, this study revealed an open pangenome with at least  
65 three species-level phylogroups (AmI, AmII, and AmIII) that appear to be evolving  
66 independently. Although genomic differences amongst phylogroups were noted, the  
67 physiological consequences were not explored.

68 To continue to expand our understanding of the genomic content and functional potential  
69 of human associated *Akkermansia*, we reconstructed 35 *Akkermansia* genomes from children  
70 aged 2-9 years and combined our genomes with those from Guo et al. [14]. With these genomes,  
71 we identified novel diversity and several putative functional differences amongst the  
72 *Akkermansia* phylogroups. Most notably, we identified the presence of genes associated with *de*  
73 *novo* cobalamin (vitamin B12) biosynthesis in selected phylogroups of *Akkermansia*.  
74 Furthermore, using isolates obtained from healthy adults, we tested these genomic predictions  
75 and confirmed vitamin B12 biosynthesis by select strains of human-associated *Akkermansia*.  
76 These results build upon our understanding of the physiological capabilities of human-associated  
77 *Akkermansia* and demonstrate an important biosynthetic activity by this bacterial lineage that  
78 further expands its potential beneficial role in the intestinal environment.

79

## 80 **RESULTS**

### 81 *Comparative genomics*

82 A total of 334.9 Gbp of metagenomic sequence data was obtained from 70 children aged  
83 2-9 years. Using SPAdes [15] to assemble contigs and MetaBAT [16] to bin contigs, we  
84 recovered 35 high quality metagenome assembled genomes (MAGs) of human associated  
85 *Akkermansia* (Table 1) from 35 of the 70 children. Completeness of the MAGs was relatively  
86 high, ranging from 68.5% to 95.5% with 31 of 35 MAGs > 90% complete. Likewise,  
87 contamination of the MAGs were low with all < 1%. On average, each MAG was 2.87 Mbp in  
88 length and contained approximately 2,420 protein-coding genes.

89 To explore the genomic diversity of human associated *Akkermansia*, we performed a  
90 pangenomic analysis using tools in anvi'o [17, 18]. These analyses included the closed genome

91 of the type strain [12] as well as 33 other human-associated and 6 mouse-associated *Akkermansia*  
92 genomes [14]. Previously, these 40 *Akkermansia* genomes were used to define three species-  
93 level phylogroups, AmI, AmII, and AmIII [14]. Merging our 35 MAGs with these 40 other  
94 genomes, we were able to regenerate the three phylogroups, but also observed a fourth  
95 phylogroup (AmIV) based on average nucleotide identity (ANI) calculated using PyANI [19]  
96 (heatmap in Figure 1). Phylogroup AmI, which includes the type strain *A. muciniphila* Muc<sup>T</sup>,  
97 contained the largest number of genomes with 40, followed by AmII (n=26), AmIV (n=7), and  
98 AmIII (n=2). Phylogroup AmIII was not observed in any of our 35 MAGs. Interestingly, both  
99 AmI and AmII included isolates obtained from mice. Within each phylogroup, ANI ranged from  
100 93.94% to 99.98% across > 65% of each pair of genomes (Supplemental Figure 1). All between  
101 phylogroup ANI comparisons were < 92%. One genome in AmIV (CDI-148A-8) showed lower  
102 similarity (on average ~94%) to other genomes within this phylogroup, possibly indicating  
103 further species level diversity within human associated *Akkermansia*. Across all phylogroups, we  
104 identified 6,557 gene clusters (GCs) with 1,021 found in all 75 genomes and 1,240 found in only  
105 one genome (Figure 1). Functional genes within the core included the cytochrome bd [20]  
106 (Amuc\_1694 and Amuc\_1695) and Type IV pili genes [21-23] (Amuc\_1098 – Amuc\_1102)  
107 previously characterized from *A. muciniphila* Muc<sup>T</sup>.

108         Next, we were interested in identifying functional gene predictions that differed amongst  
109 the phylogroups. Using Clusters of Orthologous Group (COG) annotations of GCs implemented  
110 in anvio, we observed 7 GCs putatively involved in the corrin ring stage of cobalamin (vitamin  
111 B12) biosynthesis within the AmII (n=24/26) and AmIII (n=2/2) phylogroups (Supplemental  
112 Data 1). To investigate these genes in greater detail, we manually inspected the annotations of all  
113 75 genomes using Integrated Microbial Genome (IMG) [24] and Geneious 7.1.3

114 (<https://www.geneious.com>). With this approach, we confirmed the COG annotations and  
115 identified a cluster of 8 genes that appears to code for the corrin ring biosynthesis proteins in a  
116 subset of *Akkermansia* genomes (Figure 2). Included in this genomic region were genes *cbiK/X*,  
117 *cbiL*, *cbiC*, *cbiD*, *cbiET*, *cbiFGH*, and *cbiA* that encode the enzymes associated with the  
118 anaerobic pathway of corrin ring biosynthesis. This cluster also contains a gene annotated as a  
119 hypothetical protein, which shows some similarity to a putative cobalt transporter [25]. The  
120 content and arrangement of these genes was similar to the only other named species of the  
121 *Akkermansia* genus, *Akkermansia glycaniphila* Pyt<sup>T</sup> previously isolated from a python [26].  
122 Additionally, all 75 genomes contained most of the genes associated with the upstream  
123 (tetrapyrrole precursor biosynthesis: e.g. Amuc\_0090 – 0091, Amuc\_0417, Amuc\_0896, and  
124 Amuc\_1730) and downstream (nucleotide loop assembly, e.g. Amuc\_1678 – Amuc\_1683) stages  
125 of vitamin B12 biosynthesis [27]. Genes annotated as a TonB dependent transporter (e.g.  
126 Amuc\_1684) and an extracellular solute-binding family 5 protein (e.g. Amuc\_1685) that may be  
127 involved with vitamin B12 import were also identified adjacent to the nucleotide loop assembly  
128 genes in all but one genome.

129 *A. muciniphila* Muc<sup>T</sup> was previously classified as a Cbi salvager because it lacked the  
130 genes coding for the enzymes to synthesize the corrin ring of vitamin B12, yet it needs this  
131 cofactor for methionine synthesis, nucleotide synthesis, queuosine synthesis and propionate  
132 metabolism [27]. Indeed, genes associated with these cellular functions were conserved across all  
133 phylogroups (Supplemental Data 1). Interestingly, the vitamin B12 independent methionine  
134 synthase II gene (*metE*) was present in 25 of 40 AmI genomes but not in any of the other  
135 genomes including the type strain Muc<sup>T</sup>. Together, these observations suggest that all

136 *Akkermansia* examined here are able to acquire and likely remodel corrinoids from the  
137 environment for use, but some are also able to synthesize this important cofactor.

138

### 139 ***Cultivation and validation of vitamin B12 biosynthesis***

140 To determine if specific *Akkermansia* species/strains are indeed able to *de novo*  
141 synthesize vitamin B12, we first isolated several strains of *Akkermansia* from healthy adults and  
142 compared their near-full length 16S rRNA gene sequences with those from Guo et al. [14] in  
143 ARB [28] to determine phylogroup affiliation. Across phylogroups AmI, AmII, and AmIII, 16S  
144 rRNA gene sequences were all greater than 97% identical but nevertheless clustered into the  
145 known phylogroups (Supplemental Figure 2). Based on this approach, we identified eight AmI  
146 and two AmII isolates in our culture collection. Because our MAGs did not contain any full-  
147 length 16S rRNA gene sequences, we could not positively identify AmIV members among the  
148 isolates.

149 Next, using the AmII and AmIII genomes and the genome of *A. glycaniphila* Pyt<sup>T</sup>, we  
150 designed degenerate polymerase chain reaction (PCR) primers targeting four genes, *cbiL*, *cbiC*,  
151 *cbiD*, and *cbiFGH*, of the corrin ring biosynthesis gene cluster, which encode a cobalt-factor II  
152 C20-methyltransferase, a cobalt-precorrin-8 methylmutase, a cobalt-precorrin-5B (C(1))-  
153 methyltransferase, and a cobalt-precorrin-4 methyltransferase/precorrin-3B C17-  
154 methyltransferase, respectively (Supplemental Table 1). These genes were selected because they  
155 are predicted to give the best indication of cobamide production as described by Shelton et al.  
156 [27]. As expected, only isolates from the AmII phylogroup (CSUN-17 and CSUN-34) and *A.*  
157 *glycaniphila* Pyt<sup>T</sup> showed positive amplification, whereas all AmI isolates (including *A.*  
158 *muciniphila* Muc<sup>T</sup>) failed to amplify (Table 2). Sequencing and BLASTing of these PCR

159 amplicons from CSUN-17 against *A. glycaniphila* ERS 1290231 and *Desulfovibrio vulgaris* str.  
160 Hildenborough confirmed the identity of these gene fragments (Supplemental Table 2) clearly  
161 demonstrating the presence of select *cbi* genes in the AmII phylogroup.

162         It is known that many fermentative bacteria including *A. muciniphila* Muc<sup>T</sup>, use vitamin  
163 B12 to activate methylmalonyl-CoA synthase to convert succinate to propionate [29, 30].  
164 Therefore, to demonstrate vitamin B12 biosynthesis *in vitro*, we quantified the production of  
165 succinate and propionate (and acetate) in the presence and absence of vitamin B12 in mucin  
166 medium (Figure 3). Our predictions were that the AmI phylogroup (represented by *A.*  
167 *muciniphila* Muc<sup>T</sup>) would produce acetate and succinate in the absence of vitamin B12, and  
168 acetate and propionate when B12 was present. For AmII, we predicted that acetate and  
169 propionate would be produced regardless of whether the culture medium was supplemented with  
170 vitamin B12. Results show that the AmI isolate produced propionate in a vitamin B12  
171 concentration-dependent manner (Figure 3B,C). Also as expected, the CSUN-17 isolate (AmII),  
172 produced significant amounts of acetate and propionate in the absence and presence of vitamin  
173 B12, but production was more rapid with supplementation (Figure 3D-F). These results clearly  
174 indicate vitamin B12 biosynthesis by the *Akkermansia* species represented in the AmII  
175 phylogroup.

176

## 177 **DISCUSSION**

178         *A. muciniphila* is a common gut bacterium highly regarded as beneficial member of the  
179 human gut microbiome with important probiotic potential [10, 31]. Various studies have  
180 described positive associations between the abundance of *Akkermansia* and intestinal health [3,  
181 4]. For example, *A. muciniphila* affects glucose metabolism, intestinal immunity, and its



182 abundance in the gastrointestinal tract (GIT) is inversely correlated with diseases including  
183 Crohn's disease, ulcerative colitis, and acute appendicitis [32-35]. Although a number of 16S  
184 rRNA gene variants have been observed [12] and dozens of isolates have been obtained [14],  
185 human-associated *Akkermansia* have largely been thought of as a single species and the  
186 functional potential beyond mucin degradation has gone largely unexplored. Here, we  
187 demonstrate that there are significant genomic and physiological differences amongst the human  
188 associated *Akkermansia*. Through comparative genomic analysis, we identified four phylogroups  
189 of human-associated *Akkermansia*, expanding the known genomic diversity of this lineage.  
190 Although all 16S rRNA gene sequenced examined here and elsewhere [32] are >97% identical,  
191 using an ANI of 95% across genomes as a species level delineation [36, 37] would suggest that  
192 each phylogroup represents a different species of *Akkermansia*. When we examined gene  
193 content, several phylogroup specific genes were identified that are predicted to code for  
194 functional differences amongst phylogroups further supporting species delineation. Most  
195 notably, we identified a complete set of genes involved in *de novo* biosynthesis of cobalamin, or  
196 vitamin B12, in two of the four phylogroups. We were able to validate these predictions *in vitro*  
197 using novel strains obtained from healthy adults. These findings demonstrate an ecological  
198 important function [38] not previously associated with human-associated *Akkermansia*,  
199 fundamentally altering our understanding of the diversity and physiology of this lineage. More  
200 broadly, these results continue to demonstrate the importance of merging next-generation  
201 sequencing approaches with traditional cultivation approaches to understand the basic biology of  
202 microorganisms of significance.

203         A recent comparative genomic analysis examining 11,000 bacterial genomes for  
204 cobamide production revealed that approximately 37% of bacteria are predicted to synthesize

205 cobamides, yet 86% require them for at least one cellular function [27, 39]. Additionally, Degnan  
206 et al. found that most vitamin B12 dependent human gut bacteria lack the ability to synthesize  
207 vitamin B12 [39]. The type strain *A. muciniphila* Muc<sup>T</sup> was included in the analysis by Shelton  
208 and colleagues [27] and was described as a Cbi salvager able to use exogenous sources of  
209 vitamin B12. Indeed, based on previous *in vitro* coculture experiments, *A. muciniphila* Muc<sup>T</sup> can  
210 use at least three types of cobamides; cyanocobalamin supplied in culture medium,  
211 pseudovitamin B12 produced by *Eubacterium hallii* L2-7 [29], and an unknown form produced  
212 by *Anaerostipes caccae* [40]. Presumably, *Akkermansia* are able to import these various forms of  
213 cobalamin and use them directly or remodel the lower ligand to suit their needs. With our  
214 findings, some *Akkermansia* can now be considered producers of corrinoids, altering our  
215 understanding of how they interact with other members of the human gut microbiome and  
216 potentially their human host. However, questions remain regarding the type of cobalamin  
217 produced by AmII members and more generally regarding the specificity and efficiency of  
218 cobamide import and remodeling by all *Akkermansia*.

219 Cobalamin produced by bacteria and archaea in the large intestine is not readily available  
220 to the human host for two main reasons [38]. First, the receptors responsible for cobalamin  
221 absorption are found in the small intestine, which is not as densely colonized by bacteria as the  
222 large intestine in times of health. Second, although bacteria produce many different types of  
223 cobalamin, their contribution to the available pool of cobalamin is small because many of the  
224 forms produced by bacteria are not recognized by human receptors. Thus, bacteria are thought of  
225 more as competitors for dietary cobalamin than suppliers. However, if a bacterium colonized the  
226 small intestine and produced an appropriate form of cobalamin then the cofactor is possibly  
227 available to the human host. With regards to *Akkermansia*, we do not yet know the form of

228 cobalamin produced by AmII members but *Akkermansia*-like organisms have been observed  
229 throughout the human gastrointestinal tract, including in the small intestine (reviewed in [32]).  
230 Interestingly, phylogenetic analyses consistently group AmII and AmIII isolates [14] with clones  
231 and other sequences previously observed in the small intestine [32]. Because our genomic  
232 sequence data and isolates were obtained from fecal samples, we could not determine if the  
233 different phylogroups colonize different segments of the gastrointestinal tract, but it is intriguing  
234 to speculate.

235         Although we do not yet know if humans can directly benefit from vitamin B12 produced  
236 by *Akkermansia*, there are indirect benefits resulting from the altered metabolites produced when  
237 vitamin B12 is available. Specifically, the type and quantity of short chain fatty acids (SCFA)  
238 produced during fermentation influences host health [41-43]. For example, propionate is known  
239 to help regulate appetite by stimulating the release of peptide YY (PYY) and glucagon like  
240 peptide-1 (GLP-1) by human colonic cells [44]. Less is known about the potential benefits of  
241 succinate in the human gut but in the mice cecum, succinate does improve glucose homeostasis  
242 via intestinal gluconeogenesis [45]. Conversely in the human small intestine, succinate has been  
243 shown to trigger a type 2 immune inflammatory response initiated by epithelial tuft cells [46].  
244 Thus, possessing the ability to synthesize vitamin B12 *de novo* would suggest that the AmII and  
245 AmIII phylogroups have the potential to consistently produce more propionate than succinate  
246 during mucin fermentation and, as a result, influence gut epithelial cell behavior. If the AmII  
247 and/or AmIII phylogroups do colonize the small intestine, being able to consistently produce  
248 propionate over succinate could have significant health implications.

249         In addition to propionate metabolism, *Akkermansia* are predicted to use vitamin B12 as a  
250 cofactor for methionine biosynthesis using methionine synthase type I (MetH). All genomes

251 possessed the *metH* gene; however, select AmI genomes (n=25/40) also contain the B12  
252 independent methionine synthase II gene (*metE*), suggesting that these select AmI strains can  
253 generate methionine in the absence of vitamin B12. Given that the AmI phylogroup does not  
254 synthesize vitamin B12, this would allow production of this essential amino acid when  
255 exogenous corrinoids were unavailable. How readily available corrinoids are to *Akkermansia*  
256 either from other bacterial producers or host diet is unknown but possessing both variants may be  
257 an adaptive strategy for AmI strains.

258 *A. muciniphila* is being explored as a commercial probiotic and/or therapeutic agent [35].  
259 Recent studies have reported large scale cultivation of *A. muciniphila* on a defined medium, safe  
260 for human consumption [22] and evaluated the stability and viability of the bacterium in dark  
261 chocolate [47]. Our results nevertheless indicate that there are still gaps in understanding the  
262 diversity and physiology of human associated Verrucomicrobia that need to be explored.

263

## 264 **CONCLUSION**

265 Here we carried out a pangenomic analysis of 75 *Akkermansia* genomes and identified at  
266 least four species-level phylogroups (AmI-AmIV) with differing functional potentials. However,  
267 a polyphasic taxonomic characterization that includes robust phenotypic and genomic analyses is  
268 needed to verify species designations. Quantification of SCFA by select strains in the presence  
269 and absence of vitamin B12 supplementation demonstrated cobalamin biosynthesis by AmII  
270 strains. This work alters our understanding of how *Akkermansia* interacts with its human host  
271 and other members of the human gut microbiome in its unique environment. Future work will  
272 focus on other genomic similarities and differences identified in our analysis, but also continue  
273 to explore vitamin B12 production and acquisition using our culture collection. We are also

274 continuing to isolate novel strains from healthy adults attempting to obtain representatives of  
275 each phylogroup observed or others that have yet to be observed.

276

## 277 **METHODS**

278

### 279 **METAGENOMIC STUDIES**

280

#### 281 *Recruitment and Sampling*

282 Samples used for metagenomic sequencing were obtained from healthy children aged 2-9  
283 years as described elsewhere (Herman et al., *in review*). These participants were consented under  
284 protocol #1314-223 approved by the Institutional Review Board (IRB) at California State  
285 University, Northridge (CSUN). Supplemental Data 2 provides unidentifiable demographic  
286 information of each child included in this study.

287

#### 288 *DNA extraction, Library prep, sequencing*

289 Parents collected fecal samples in the privacy of their homes using sterile, double-tipped  
290 swabs by swabbing toilet paper (or diapers) after use. Samples were then frozen at -20 °C within  
291 24 hrs of collection, and transported on blue ice to the lab (<30 min transit), where they were  
292 stored at -80 °C. This protocol is minimally invasive and has been successfully used in many  
293 similar, community-based research projects [48-50].

294 DNA was extracted from approximately ~0.1g of collected samples using the MOBIO  
295 Power Soil®, DNA Isolation kit following a modified extraction protocol [51]. Extracts were  
296 then quantified using a Qubit 2.0 with high sensitivity reagents, and 100ng of DNA from each

297 sample was sheared into 300bp fragments using a Covaris M220 [52]. The NEBNext®  
298 Ultra™ DNA Library Prep Kit for Illumina® [53] was used to prep dual indexed metagenomic  
299 libraries from the sheared samples. Libraries were confirmed using a BIO-RAD Experion™  
300 Automated Electrophoresis System, and KAPA qPCR NGS library quantification. Two  
301 sequencing runs of the multiplexed libraries were conducted on an Illumina Hiseq 2000 (2 x  
302 100bp) at the University of California Irvine, Genomics High-Throughput Facility.

303

### 304 *Metagenomic Sequence processing*

305 Raw fastq files from each sample were trimmed using TRIMMOMATIC [54]  
306 (ILLUMINACLIP:TruSeq3-PE.fa:2:30:10 LEADING:3 TRAILING:3 SLIDINGWINDOW:4:15  
307 MINLEN:36). Trimmed sequences were then screened against the human genome (GRCh38)  
308 using DeconSeq [55] in order to remove any potential human DNA sequences. Non-human  
309 sequences were further cleaned using PRINSEQ [56] with the following parameters: -  
310 min\_qual\_mean 20 and -ns\_max\_n 3. Remaining sequences without a matepair were removed  
311 and paired sequences were assembled using the default parameters for metagenomes in SPAdes  
312 [15]. Resulting contigs > 2 Kbp were binned used MetaBAT [16] with default parameters and the  
313 taxonomy and completeness of bins were verified using the taxonomy workflow of CheckM [57]  
314 against the Verrucomicrobia phylum. We determined that bins confidently identified as  
315 ‘k\_Bacteria (UID2982)’ were *Akkermansia* and evaluated the quality of those bins further using  
316 MiGA [58]. Assembled contigs (>2kb) from each child with a high quality *Akkermansia* bin  
317 were submitted to IMG-M where they were annotated using their workflow [24]. Both IMG and  
318 Geneious 7.1.3 (<https://www.geneious.com>) were used to manually inspect annotations of  
319 interest. Vitamin B12 associated genes were detected by searching for annotations from Enzyme

320 Commission (EC) numbers, IMG terms, pfam, and Clusters of Orthologous Groups (COG) [24,  
321 59, 60]. The annotations included those used by Shelton et al. [27] and Degnan et al. [39].

322

### 323 ***Pangenome analysis***

324 To explore the *Akkermansia* pangenome, we combined our 35 MAGs with 40 other  
325 publically available genomes in anvi'o [17, 18]. Assembled fasta files were first converted to  
326 'db' files using the 'anvi-script-FASTA-to-contigs-db' command that uses Prodigal [61] to call  
327 open reading frames. Each 'db' file was then annotated against the COG database [62] using  
328 'anvi-run-ncbi-cogs' with the '--use-ncbi-blast' flag. After generating the genome storage file  
329 with 'anvi-gen-genomes-storage,' the 'anvi-pan-genome' command was run with the identical  
330 parameters (--num-threads 12, --minbit 0.5, --mcl-inflation 10, --use-ncbi-blast) outlined in  
331 Delmont and Eren [17, 63, 64]. The pangenome was visualized and aesthetics were modified  
332 using the 'anvi-display-pan' command. To calculate average nucleotide identity (ANI) in anvi'o,  
333 the 'anvi-compute-ani' command, which utilizes PyANI [19], was used. To identify functions  
334 (i.e. COG annotations) that were differentially distributed amongst the phylogroups, we used the  
335 'anvi-get-enriched-functions-per-pan-group' with phylogroups (AmI-AmIV) as the category.

336

## 337 CULTIVATION STUDIES

338

### 339 ***Recruitment and Sampling***

340 Fecal samples used in culturing of *Akkermansia* isolates were obtained from healthy  
341 adults using swabs as previously described [49] under IRB protocol #1516-146. Collected

342 samples were refrigerated (4 °C) and transferred to culture medium (see below) within 24-hours  
343 of collection.

344

345 ***Enrichment, isolation, genomic DNA extraction, and 16S rRNA gene sequencing***

346 Anaerobic mucin medium was modified slightly from Derrien et al. [13] and contained (l<sup>-</sup>  
347 <sup>1</sup>) 0.4 g KH<sub>2</sub>PO<sub>4</sub>, 0.53 g Na<sub>2</sub>HPO<sub>4</sub>, 0.3 g NH<sub>4</sub>Cl, 0.3 g NaCl, 0.1 g MgCl<sub>2</sub> · 6H<sub>2</sub>O, 0.4 g NaHCO<sub>3</sub>,  
348 1 mg resazurin, and 10 ml trace mineral solution as described by Ferguson and Mah [65]. pH of  
349 the medium was adjusted to 6.5. Medium was prepared with boiled MiliQ water under constant  
350 gassing with a gas mixture consisting of N<sub>2</sub>/CO<sub>2</sub> (80:20, v/v). Culture medium was later modified  
351 to include 1mM L-threonine and 10 g/L tryptone (Oxoid) as described previously [30]. Broth  
352 medium was prepared in serum tubes or bottles and sealed with butyl rubber stoppers and  
353 aluminum crimp caps prior to autoclaving at 121°C and 15 psi for 15 minutes. Prior to  
354 inoculation, medium was reduced with autoclaved 0.05% Na<sub>2</sub>S · 9H<sub>2</sub>O and supplemented with  
355 0.5% - 1.0% purified hog gastric mucin (Type III, Sigma-Aldrich, St. Louis, MO). Purified  
356 mucin was prepared by first autoclaving a 5% or 10% solution prepared in 0.01 M phosphate  
357 buffer (stock = 88.46 g/L KH<sub>2</sub>PO<sub>4</sub> and 60.97 g/L K<sub>2</sub>HPO<sub>4</sub>), performing dialysis using a 12-14  
358 kD membrane (Spectra/Por 4, Spectrum Laboratories, Rancho Dominguez, CA), centrifuging  
359 twice for 10 min at 10,000 rpm, and filter sterilizing through 0.2 µm syringe filters (Whatman  
360 GE Healthcare Life Sciences, Chicago, IL) into growth medium. For solid medium, Noble Agar  
361 (Difco, Detroit, MI) was added and plates were poured in an anaerobic chamber (Bactron IV,  
362 Sheldon Manufacturing, Inc., Cornelius, OR) under an atmosphere of N<sub>2</sub>/CO<sub>2</sub>/H<sub>2</sub> (80/15/5, v/v).  
363 All incubations were performed at 37 °C in the Bactron IV anaerobic chamber.



364 Enrichments cultures targeting mucin-degrading bacteria were initiated by transferring  
365 fecal swabs into 5ml of anaerobic mucin medium in serum tubes and performing ten-fold serial  
366 dilutions up the  $10^{-7}$ . Cultures were incubated for up to 5 days, monitored daily for changes in  
367 turbidity, and inspected using phase-contrast microscopy (Zeiss Axioskop). Positive cultures  
368 with oval cells in pairs were further diluted in broth medium and/or transferred to solid medium  
369 until purity could be verified microscopically and by sequencing of the 16S rRNA gene. For  
370 sequencing, genomic DNA was isolated using the MoBio Ultraclean Microbial DNA Isolation  
371 Kit (Mo Bio, Carlsbad, CA) following the manufacturer's instructions. Briefly, 1.8 mL of  
372 overnight bacterial culture was centrifuged at  $10,000 \times g$  for 30 seconds, the pellet was  
373 resuspended in 300  $\mu\text{L}$  of MicroBead Solution (Mo Bio, Carlsbad, CA), and the DNA was  
374 subsequently isolated following the manufacturer's instructions. For amplification of the 16S  
375 rRNA gene via PCR, 2  $\mu\text{L}$  of extracted genomic DNA was added to 25  $\mu\text{L}$  of GoTaq Green  
376 Master Mix (Promega, Madison, WI) and 1  $\mu\text{L}$  of 10  $\mu\text{M}$  universal primers 8F (5'-  
377 AGAGTTTGATCCTGGCTCAG-3') and 1492R (5'-TACGGTTACCTTGTTACGA-3') using a  
378 50  $\mu\text{L}$  final PCR reaction volume. PCR was conducted using an Eppendorf Mastercycler Pro S  
379 96 well thermocycler using a program of an initial denaturation at  $95^{\circ}\text{C}$  for 3 min, followed by  
380 30 cycles of  $95^{\circ}\text{C}$  for 45 sec, annealing at  $45^{\circ}\text{C}$  for 1 min,  $72^{\circ}\text{C}$  for 1 min, a final extension of  
381  $72^{\circ}\text{C}$  for 7 min, and holding at  $4^{\circ}\text{C}$ . PCR reactions were purified using the QIAquick PCR  
382 Purification Kit (Qiagen). Initial sequencing of the 16S rRNA gene was performed using either  
383 the 8F or 1492R primer on an ABI Prism 3730 DNA sequencer (Laragen Sequencing and  
384 Genotyping in Culver City, CA). If cultures were pure and positively BLASTed to *A.*  
385 *muciniphila*, the near full length 16S rRNA gene was sequenced with additional primers (515F  
386 (GTGCCAGCMGCCGCGGTAA), 806R (GGACTACHVGGGTWTCTAAT), and 8F or

387 1492R). Sequences associated with each isolate were then assembled in Geneious 7.1.3  
388 (<https://www.geneious.com>) and imported into ARB [28] as discussed below. General  
389 demographic information about donors is provided as Supplemental Table 3.

390

### 391 *16S rRNA gene phylogeny*

392 To determine phylogroup affiliation of our isolates, 16S rRNA gene sequences of the  
393 Guo et al. [14] isolates were first extracted from their genomic sequence data and imported into  
394 ARB [28]. Once in ARB, gene sequences were aligned with secondary structure constraints  
395 against the 16S rRNA gene sequence of *A. muciniphila* Muc<sup>T</sup>, manually inspected, and those that  
396 were < 1000 bp were discarded. Similarly, 16S rRNA gene sequences of our novel isolates were  
397 imported and aligned in ARB. A custom alignment mask excluding nucleotide positions found in  
398 less than half of all isolates was generated and masked alignments were imported into MEGA7  
399 [66] where phylogenetic reconstruction was generated using the maximum-likelihood approach.  
400 Because we knew the affiliation of the Guo et al [14] isolates, we were able to place our isolates  
401 in this framework based on placement in the 16S rRNA gene tree.

402

### 403 *Corrin biosynthesis PCR screen of isolates and gene sequencing*

404 To amplify conserved regions of corrin biosynthesis associated genes, degenerate primers  
405 were designed (Supplemental Table 1). Select corrin biosynthesis associated homologous  
406 sequences were aligned using BioEdit Sequence Alignment Editor Version 7.0.5  
407 (<http://www.mbio.ncsu.edu/BioEdit/page2.html>) (locus tags of sequences used in the  
408 alignments are shown in Supplemental Table 4). All gene sequences were obtained from JGI  
409 IMG/ER. Conserved regions were found using the Accessory Application ClustalW Multiple

410 alignment tool in BioEdit [67]. For amplification of corrin biosynthesis genes *cbiL*, *cbiC*, *cbiD*,  
411 and *cbiFGH*, 1 $\mu$ L of genomic DNA was added to 12.5  $\mu$ L of GoTaq Green Master Mix  
412 (Promega, Madison, WI) and 1  $\mu$ L of each 10  $\mu$ M primer using a 25  $\mu$ L final PCR reaction  
413 volume. PCR conditions were optimized, and a PCR screen of isolates was carried out in  
414 duplicates using a PCR program of an initial denaturation at 95°C for 2 min, followed by 25-35  
415 cycles of 95°C for 45 sec, annealing at 52°C to 62°C for 30 sec to 1 min, 72°C for 45 sec, a final  
416 extension of 72°C for 5 min, and holding at 4°C. PCR amplicons were separated and visualized  
417 using 1% agarose gel. PCR products were purified using the QIAquick PCR Purification Kit  
418 (Qiagen). For the amplification of *cbiFGH*, the amplicon was excised out of the gel and gel  
419 purified using the PureLink Quick Gel Extraction and PCR Purification Combo Kit (Invitrogen).  
420 The amplicons were sequenced as described above. BioEdit Version 7.0.5 was used to analyze  
421 the sequences. Sequences of PCR amplicons from CSUN-17 were checked by blastx using the  
422 IMG and the NCBI database to examine similarity to vitamin B12 associated genes from the  
423 genomes *A. glycaniphila* ERS 1290231 and *Desulfovibrio vulgaris* str. Hildenborough  
424 (Supplemental Table 2).

425

#### 426 ***Quantification of short chain fatty acids via HPLC***

427 To quantify production of short-chain fatty acids with and without vitamin  
428 supplementation *A. muciniphila* Muc<sup>T</sup> (AmI) and CSUN-17 (AmII) were grown in anaerobic  
429 mucin medium supplemented with 1mM L-threonine, 10 g/L tryptone (Oxoid), 1% purified  
430 mucin and vitamin supplementation depending on treatment conditions. For vitamin  
431 supplementation, we first performed the experiment using the ATCC MD-VS at the  
432 recommended concentration (10 ml/L). Because the concentration of vitamin B12 in the

433 formulation is 100 fold less than those reported by Belzer et al. [29], we subsequently performed  
434 a second experiment with pure vitamin B12 (Sigma-Aldrich, St. Louis, MO) using a final  
435 concentration of 100 ng/ml. For all experiments, overnight cultures were transferred in  
436 appropriate medium 3 times with the final transfer used to inoculate 25ml of medium at 5% in  
437 quadruplicate for each isolate and treatment. OD<sub>600nm</sub> (Eppendorf BioPhotometer plus) was  
438 recorded at inoculation and at 12, 16, and 20 hours. An additional 1.25 ml of culture was  
439 removed at each time point, centrifuged at 15,000 x g for 10 minutes, and the cell-free  
440 supernatant was filtered through a 13mm, 0.2µm SPARTAN HPLC syringe filter. Samples were  
441 stored at -20°C until HPLC analysis.

442 High-performance liquid chromatography (HPLC) was performed using a Waters Breeze  
443 2 system (Waters Corp., Milford, MA, USA) equipped with a refractive index detector (model  
444 2414). An Aminex HPX-87H column (Bio-Rad Laboratories) was used to measure production of  
445 short chain fatty acids (SCFA). Sulfuric acid (5mM) was used as the mobile phase at a flow rate  
446 of 0.6 mL/min. Peak areas and retention times were compared against known standards. Samples  
447 were also compared against a media-only control to determine background levels of acetate,  
448 propionate, and succinate present in the starting medium before growth. Approximately 3mM  
449 propionate was detected in the culture medium and subtracted from all respective measurements.

450

## 451 **LIST OF ABBREVIATIONS**

452 Gastrointestinal tract (GIT), short chain fatty acids (SCFA), polymerase chain reaction (PCR),  
453 high-performance liquid chromatography (HPLC), metagenome assembled genomes (MAGs),  
454 average nucleotide identity (ANI), gene cluster (GC), Clusters of Orthologous Groups (COG),  
455 Enzyme Commission (EC), Integrated Microbial Genomes (IMG)

456

457 **DECLARATIONS**

458 *Ethics approval and consent to participate:* Aspects of this work that included human  
459 subjects was approved by the Institutional Review Board at California State University,  
460 Northridge under protocol #1314-223 (metagenomic study) and #1516-146 (cultivation study).  
461 For the metagenomic study, verbal assent was obtained from each child and written consent was  
462 obtained from one parent/guardian. Written consent was obtained from each subject in the  
463 cultivation studies.

464 *Consent for publication:* Not applicable.

465 *Availability of data and material:* Genomic sequence data from Guo et al. [14] is  
466 available at GenBank under BioProject #PRJNA331216. Our quality filtered metagenomic  
467 sequence data are available at GenBank under BioProject #PRJNA525290. Additionally,  
468 assembled contigs >2kb from children who contained an *Akkermansia* bin are available in IMG  
469 under GOLD Study ID Gs0133482. It is important to note that contigs available in IMG include  
470 not only *Akkermansia* contigs, but also all contigs from each child. Supplemental Data 3 has a  
471 list of the *Akkermansia* contigs in IMG that were included in our analysis. Near full-length 16S  
472 rRNA gene sequences of our isolates are available in GenBank under accession numbers  
473 MK577303 – MK577312. Corrin gene sequences of isolate CSUN-17 are available in GenBank  
474 under accession numbers MK585566 – MK585569.

475 *Competing interests:* The authors declare that they have no competing interests.

476 *Funding:* Research reported in this publication was supported by the National Institute Of  
477 General Medical Sciences (NIGMS) of the National Institutes of Health (NIH) under Award  
478 Number SC2GM122620 to GEF. NK and KG were supported under Award Numbers

479 TL4GM118977, RL5GM118975, and UL1GM118976 also from NIGMS. KLC and MP were  
480 supported by grant R01DE024463 from the National Institute of Dental and Craniofacial  
481 Research (NIDCR) of the U.S. National Institutes of Health. The content is solely the  
482 responsibility of the authors and does not necessarily represent the official views of the National  
483 Institutes of Health. Oak Ridge National Laboratory (ORNL) is managed by UT-Battelle, LLC  
484 for the U.S. Department of Energy under Contract No. DE-AC05-00OR22725.

485 *Authors' contributions:* NK conducted wet lab work, analyzed and interpreted the data,  
486 and wrote the paper. KG performed bioinformatic analysis, and analyzed and interpreted the  
487 data. KLC conducted wet lab work and analyzed and interpreted the data. EL collected samples,  
488 conducted wet lab work, and analyzed and interpreted the data. NR conducted wet lab work and  
489 analyzed and interpreted the data. MP analyzed and interpreted the data. GEF conceived of and  
490 designed the study, performed bioinformatics analysis, analyzed and interpreted the data, and  
491 wrote the paper. All authors read and approved the final manuscript.

492 *Acknowledgements:* The authors would like to thank Dara Fluke, Erik Hearn, Christopher  
493 Herrera, Arinnae Kurdian, Jonathan Lemus, Claudia Mendoza, and Priscilla Salcedo for help in  
494 the isolations. We would also like to thank Dena Herman, Joan Maltese, Zelzah Guzman, Alison  
495 Gambou, Ann-Marie Pham, Griseida Ruiz, and Jessica Saavedra for all their efforts in participant  
496 recruitment for the metagenomic studies. Finally, thanks to all study participants that provided  
497 fecal samples, without you none of this would be possible.

498

499 **Figure Captions**

500

501 **Figure 1.** Pangenome of 75 *Akkermansia* genomes generated using anvio [17, 18]. Each  
502 concentric circle represents a bacterial genome with purple circles belonging to AmI, blue AmII,  
503 orange AmIII, and green AmIV phylogroups. Blank areas in each circle indicate absence of a  
504 particular gene cluster (GC) in that genome. A total of 6,557 GCs were observed across all  
505 genomes. Genomes are ordered by average nucleotide identity (ANI) as depicted by the pink  
506 heatmap in the upper right section of the figure. Host organisms are indicated just below the  
507 heatmap in white (human) or black (mouse) boxes. Similarly, genome sources are indicated in  
508 white [12], grey [14] and black (this work) boxes. The outer most ring is colored by presence  
509 (red) or absence (grey) of functional COG annotations. The next ring indicates the number of  
510 genomes that particular gene cluster was observed in. Singleton (blue) and core genes (green) are  
511 indicated outside of the concentric circles. Corrin ring biosynthesis genes are indicated in the  
512 AmII (blue) and AmIII (orange) genomes.

513

514 **Figure 2.** (A) Corrin ring biosynthesis gene cluster from isolate *A. muciniphila* CSUN-17  
515 (phylogroup AmII). Presence of genes in the corrin ring biosynthesis gene cluster in  
516 phylogroups AmI, AmII, AmIII, and AmIV. Plus sign (+) above table indicates presence of gene  
517 in *A. muciniphila* CSUN phylogroup AmII isolates using PCR screen of *A. muciniphila* CSUN  
518 isolates. (B) Proposed strategy of propionate production in *A. muciniphila* CSUN-17  
519 (phylogroup AmII) is shown involving *de novo* vitamin B12 biosynthesis leading to activation of  
520 methylmalonyl-CoA synthase and conversion of succinate to propionate.

521

522 **Figure 3.** Production of acetate, succinate, and propionate through time by two strains of human  
523 associated *Akkermansia* grown on purified hog gastric mucin (1%) in the absence of vitamins (A,

524 D), with ATCC MD-VS supplementation (B, E; 1% v/v vitamin solution/medium, vitamin B12  
525 at a final concentration of 1  $\mu\text{g/L}$  medium), and with vitamin B12 as cyanocobalamin (C, F; 100  
526  $\mu\text{g/L}$ ). All values were averaged from four replicates and error bars represent the standard  
527 deviation. Background levels of organic acids present in the culture medium were subtracted  
528 from calculated averages when necessary.



529 **References:**

- 530 1. Collado MC, Derrien M, Isolauri E, de Vos WM, Salminen S: **Intestinal integrity and**  
531 **Akkermansia muciniphila, a mucin-degrading member of the intestinal**  
532 **microbiota present in infants, adults, and the elderly.** *Applied and Environmental*  
533 *Microbiology* 2007, **73**(23):7767-7770.
- 534 2. Derrien M, Collado MC, Ben-Amor K, Salminen S, de Vos WM: **The Mucin degrader**  
535 **Akkermansia muciniphila is an abundant resident of the human intestinal**  
536 **tract.** *Applied and Environmental Microbiology* 2008, **74**(5):1646-1648.
- 537 3. Karlsson CL, Onnerfalt J, Xu J, Molin G, Ahrne S, Thorngren-Jerneck K: **The**  
538 **microbiota of the gut in preschool children with normal and excessive body**  
539 **weight.** *Obesity (Silver Spring, Md)* 2012, **20**(11):2257-2261.
- 540 4. T FST, Grzeskowiak LM, Salminen S, Laitinen K, Bressan J, Gouveia Peluzio Mdo C:  
541 **Faecal levels of Bifidobacterium and Clostridium coccoides but not plasma**  
542 **lipopolysaccharide are inversely related to insulin and HOMA index in women.**  
543 *Clinical nutrition (Edinburgh, Scotland)* 2013, **32**(6):1017-1022.
- 544 5. Dao MC, Everard A, Aron-Wisnewsky J, Sokolovska N, Prifti E, Verger EO, Kayser BD,  
545 Levenez F, Chilloux J, Hoyles L *et al*: **Akkermansia muciniphila and improved**  
546 **metabolic health during a dietary intervention in obesity: relationship with**  
547 **gut microbiome richness and ecology.** *Gut* 2016, **65**(3):426-436.
- 548 6. Everard A, Belzer C, Geurts L, Ouwerkerk JP, Druart C, Bindels LB, Guiot Y, Derrien  
549 M, Muccioli GG, Delzenne NM *et al*: **Cross-talk between Akkermansia muciniphila**  
550 **and intestinal epithelium controls diet-induced obesity.** *Proceedings of the*  
551 *National Academy of Sciences of the United States of America* 2013, **110**(22):9066-  
552 9071.
- 553 7. Shin NR, Lee JC, Lee HY, Kim MS, Whon TW, Lee MS, Bae JW: **An increase in the**  
554 **Akkermansia spp. population induced by metformin treatment improves**  
555 **glucose homeostasis in diet-induced obese mice.** *Gut* 2014, **63**(5):727-735.
- 556 8. Hanninen A, Toivonen R, Poysti S, Belzer C, Plovier H, Ouwerkerk JP, Emani R, Cani  
557 PD, De Vos WM: **Akkermansia muciniphila induces gut microbiota remodelling**  
558 **and controls islet autoimmunity in NOD mice.** *Gut* 2018, **67**(8):1445-1453.
- 559 9. Belzer C, de Vos WM: **Microbes inside--from diversity to function: the case of**  
560 **Akkermansia.** *The ISME journal* 2012, **6**(8):1449-1458.
- 561 10. Derrien M, Belzer C, de Vos WM: **Akkermansia muciniphila and its role in**  
562 **regulating host functions.** *Microb Pathog* 2017, **106**:171-181.
- 563 11. Lopez-Siles M, Enrich-Capo N, Aldeguer X, Sabat-Mir M, Duncan SH, Garcia-Gil LJ,  
564 Martinez-Medina M: **Alterations in the Abundance and Co-occurrence of**  
565 **Akkermansia muciniphila and Faecalibacterium prausnitzii in the Colonic**  
566 **Mucosa of Inflammatory Bowel Disease Subjects.** *Frontiers in cellular and*  
567 *infection microbiology* 2018, **8**:281.
- 568 12. van Passel MW, Kant R, Zoetendal EG, Plugge CM, Derrien M, Malfatti SA, Chain PS,  
569 Woyke T, Palva A, de Vos WM *et al*: **The genome of Akkermansia muciniphila, a**  
570 **dedicated intestinal mucin degrader, and its use in exploring intestinal**  
571 **metagenomes.** *Plos One* 2011, **6**(3):e16876.

- 572 13. Derrien M, Vaughan EE, Plugge CM, de Vos WM: **Akkermansia muciniphila gen.**  
573 **nov., sp. nov., a human intestinal mucin-degrading bacterium.** *International*  
574 *Journal of Systematic and Evolutionary Microbiology* 2004, **54**(Pt 5):1469-1476.
- 575 14. Guo X, Li S, Zhang J, Wu F, Li X, Wu D, Zhang M, Ou Z, Jie Z, Yan Q *et al*: **Genome**  
576 **sequencing of 39 Akkermansia muciniphila isolates reveals its population**  
577 **structure, genomic and functional diversity, and global distribution in**  
578 **mammalian gut microbiotas.** *BMC Genomics* 2017, **18**(1):800.
- 579 15. Bankevich A, Nurk S, Antipov D, Gurevich AA, Dvorkin M, Kulikov AS, Lesin VM,  
580 Nikolenko SI, Pham S, Pribelski AD *et al*: **SPAdes: a new genome assembly**  
581 **algorithm and its applications to single-cell sequencing.** *J Comput Biol* 2012,  
582 **19**(5):455-477.
- 583 16. Kang DD, Froula J, Egan R, Wang Z: **MetaBAT, an efficient tool for accurately**  
584 **reconstructing single genomes from complex microbial communities.** *PeerJ*  
585 2015, **3**:e1165.
- 586 17. Delmont TO, Eren AM: **Linking pangenomes and metagenomes: the**  
587 **Prochlorococcus metapangenome.** *PeerJ* 2018, **6**:e4320.
- 588 18. Eren AM, Esen OC, Quince C, Vineis JH, Morrison HG, Sogin ML, Delmont TO: **Anvi'o:**  
589 **an advanced analysis and visualization platform for 'omics data.** *PeerJ* 2015,  
590 **3**:e1319.
- 591 19. Pritchard L, Glover RH, Humphris S, Elphinstone JG, Toth IK: **Genomics and**  
592 **taxonomy in diagnostics for food security: soft-rotting enterobacterial plant**  
593 **pathogens.** *Analytical Methods* 2016, **8**(1):12-24.
- 594 20. Ouwerkerk JP, van der Ark KCH, Davids M, Claassens NJ, Finestra TR, de Vos WM,  
595 Belzer C: **Adaptation of Akkermansia muciniphila to the Oxidic-Anoxic Interface**  
596 **of the Mucus Layer.** *Appl Environ Microbiol* 2016, **82**(23):6983-6993.
- 597 21. Ottman N, Huuskonen L, Reunanen J, Boeren S, Klievink J, Smidt H, Belzer C, de Vos  
598 WM: **Characterization of Outer Membrane Proteome of Akkermansia**  
599 **muciniphila Reveals Sets of Novel Proteins Exposed to the Human Intestine.**  
600 *Front Microbiol* 2016, **7**:1157.
- 601 22. Plovier H, Everard A, Druart C, Depommier C, Van Hul M, Geurts L, Chilloux J, Ottman  
602 N, Duparc T, Lichtenstein L *et al*: **A purified membrane protein from**  
603 **Akkermansia muciniphila or the pasteurized bacterium improves metabolism**  
604 **in obese and diabetic mice.** *Nature medicine* 2017, **23**(1):107-113.
- 605 23. Ottman N, Reunanen J, Meijerink M, Pietila TE, Kainulainen V, Klievink J, Huuskonen  
606 L, Aalvink S, Skurnik M, Boeren S *et al*: **Pili-like proteins of Akkermansia**  
607 **muciniphila modulate host immune responses and gut barrier function.** *PLoS*  
608 *One* 2017, **12**(3):e0173004.
- 609 24. Chen IA, Chu K, Palaniappan K, Pillay M, Ratner A, Huang J, Huntemann M, Varghese  
610 N, White JR, Seshadri R *et al*: **IMG/M v.5.0: an integrated data management and**  
611 **comparative analysis system for microbial genomes and microbiomes.** *Nucleic*  
612 *Acids Res* 2019, **47**(D1):D666-D677.
- 613 25. Rodionov DA, Dubchak I, Arkin A, Alm E, Gelfand MS: **Reconstruction of regulatory**  
614 **and metabolic pathways in metal-reducing delta-proteobacteria.** *Genome*  
615 *biology* 2004, **5**(11):R90.

- 616 26. Ouwerkerk JP, Aalvink S, Belzer C, de Vos WM: **Akkermansia glycaniphila sp. nov.,**  
617 **an anaerobic mucin-degrading bacterium isolated from reticulated python**  
618 **faeces.** *Int J Syst Evol Microbiol* 2016, **66**(11):4614-4620.
- 619 27. Shelton AN, Seth EC, Mok KC, Han AW, Jackson SN, Haft DR, Taga ME: **Uneven**  
620 **distribution of cobamide biosynthesis and dependence in bacteria predicted**  
621 **by comparative genomics.** *The ISME journal* 2018.
- 622 28. Ludwig W, Strunk O, Westram R, Richter L, Meier H, Yadhukumar, Buchner A, Lai T,  
623 Steppi S, Jobb G *et al*: **ARB: a software environment for sequence data.** *Nucleic*  
624 *Acids Res* 2004, **32**(4):1363-1371.
- 625 29. Belzer C, Chia LW, Aalvink S, Chamlagain B, Piironen V, Knol J, de Vos WM:  
626 **Microbial Metabolic Networks at the Mucus Layer Lead to Diet-Independent**  
627 **Butyrate and Vitamin B12 Production by Intestinal Symbionts.** *MBio* 2017, **8**(5).
- 628 30. Ottman N, Davids M, Suarez-Diez M, Boeren S, Schaap PJ, Martins Dos Santos VAP,  
629 Smidt H, Belzer C, de Vos WM: **Genome-Scale Model and Omics Analysis of**  
630 **Metabolic Capacities of Akkermansia muciniphila Reveal a Preferential Mucin-**  
631 **Degrading Lifestyle.** *Appl Environ Microbiol* 2017, **83**(18).
- 632 31. Cani PD, de Vos WM: **Next-Generation Beneficial Microbes: The Case of**  
633 **Akkermansia muciniphila.** *Front Microbiol* 2017, **8**:1765.
- 634 32. Geerlings SY, Kostopoulos I, de Vos WM, Belzer C: **Akkermansia muciniphila in**  
635 **the Human Gastrointestinal Tract: When, Where, and How?** *Microorganisms*  
636 2018, **6**(3).
- 637 33. Png CW, Linden SK, Gilshenan KS, Zoetendal EG, McSweeney CS, Sly LI, McGuckin  
638 MA, Florin TH: **Mucolytic bacteria with increased prevalence in IBD mucosa**  
639 **augment in vitro utilization of mucin by other bacteria.** *The American journal of*  
640 *gastroenterology* 2010, **105**(11):2420-2428.
- 641 34. Rajilic-Stojanovic M, Shanahan F, Guarner F, de Vos WM: **Phylogenetic analysis of**  
642 **dysbiosis in ulcerative colitis during remission.** *Inflammatory bowel diseases*  
643 2013, **19**(3):481-488.
- 644 35. Naito Y, Uchiyama K, Takagi T: **A next-generation beneficial microbe:**  
645 **Akkermansia muciniphila.** *Journal of clinical biochemistry and nutrition* 2018,  
646 **63**(1):33-35.
- 647 36. Richter M, Rossello-Mora R: **Shifting the genomic gold standard for the**  
648 **prokaryotic species definition.** *Proc Natl Acad Sci U S A* 2009, **106**(45):19126-  
649 19131.
- 650 37. Kim M, Oh HS, Park SC, Chun J: **Towards a taxonomic coherence between**  
651 **average nucleotide identity and 16S rRNA gene sequence similarity for species**  
652 **demarcation of prokaryotes.** *Int J Syst Evol Microbiol* 2014, **64**(Pt 2):346-351.
- 653 38. Degan PH, Taga ME, Goodman AL: **Vitamin B12 as a modulator of gut microbial**  
654 **ecology.** *Cell Metab* 2014, **20**(5):769-778.
- 655 39. Degan PH, Barry NA, Mok KC, Taga ME, Goodman AL: **Human gut microbes use**  
656 **multiple transporters to distinguish vitamin B(1)(2) analogs and compete in**  
657 **the gut.** *Cell host & microbe* 2014, **15**(1):47-57.
- 658 40. Chia LW, Hornung BVH, Aalvink S, Schaap PJ, de Vos WM, Knol J, Belzer C:  
659 **Deciphering the trophic interaction between Akkermansia muciniphila and**  
660 **the butyrogenic gut commensal Anaerostipes caccae using a**  
661 **metatranscriptomic approach.** *Antonie Van Leeuwenhoek* 2018, **111**(6):859-873.

- 662 41. Koh A, De Vadder F, Kovatcheva-Datchary P, Backhed F: **From Dietary Fiber to**  
663 **Host Physiology: Short-Chain Fatty Acids as Key Bacterial Metabolites.** *Cell*  
664 2016, **165**(6):1332-1345.
- 665 42. Scheppach W: **Effects of short chain fatty acids on gut morphology and function.**  
666 *Gut* 1994, **35**(1 Suppl):S35-38.
- 667 43. Hu J, Lin S, Zheng B, Cheung PCK: **Short-chain fatty acids in control of energy**  
668 **metabolism.** *Critical reviews in food science and nutrition* 2018, **58**(8):1243-1249.
- 669 44. Chambers ES, Viardot A, Psichas A, Morrison DJ, Murphy KG, Zac-Varghese SE,  
670 MacDougall K, Preston T, Tedford C, Finlayson GS *et al*: **Effects of targeted delivery**  
671 **of propionate to the human colon on appetite regulation, body weight**  
672 **maintenance and adiposity in overweight adults.** *Gut* 2015, **64**(11):1744-1754.
- 673 45. De Vadder F, Kovatcheva-Datchary P, Zitoun C, Duchamp A, Backhed F, Mithieux G:  
674 **Microbiota-Produced Succinate Improves Glucose Homeostasis via Intestinal**  
675 **Gluconeogenesis.** *Cell Metab* 2016, **24**(1):151-157.
- 676 46. Nadsombati MS, McGinty JW, Lyons-Cohen MR, Jaffe JB, DiPeso L, Schneider C,  
677 Miller CN, Pollack JL, Nagana Gowda GA, Fontana MF *et al*: **Detection of Succinate**  
678 **by Intestinal Tuft Cells Triggers a Type 2 Innate Immune Circuit.** *Immunity*  
679 2018, **49**(1):33-41 e37.
- 680 47. Marcial-Coba MS, Saaby L, Knochel S, Nielsen DS: **Dark chocolate as a stable**  
681 **carrier of microencapsulated Akkermansia muciniphila and Lactobacillus**  
682 **casei.** *FEMS Microbiol Lett* 2019, **366**(2).
- 683 48. Costello EK, Lauber CL, Hamady M, Fierer N, Gordon JI, Knight R: **Bacterial**  
684 **community variation in human body habitats across space and time.** *Science*  
685 2009, **326**(5960):1694-1697.
- 686 49. Flores GE, Caporaso JG, Henley JB, Rideout JR, Domogala D, Chase J, Leff JW,  
687 Vazquez-Baeza Y, Gonzalez A, Knight R *et al*: **Temporal variability is a**  
688 **personalized feature of the human microbiome.** *Genome biology* 2014,  
689 **15**(12):531.
- 690 50. Song SJ, Lauber C, Costello EK, Lozupone CA, Humphrey G, Berg-Lyons D, Caporaso  
691 JG, Knights D, Clemente JC, Nakielny S *et al*: **Cohabiting family members share**  
692 **microbiota with one another and with their dogs.** *eLife* 2013, **2**:e00458.
- 693 51. Caporaso JG, Lauber CL, Costello EK, Berg-Lyons D, Gonzalez A, Stombaugh J, Knights  
694 D, Gajer P, Ravel J, Fierer N *et al*: **Moving pictures of the human microbiome.**  
695 *Genome biology* 2011, **12**(5):R50.
- 696 52. Head SR, Komori HK, LaMere SA, Whisenant T, Van Nieuwerburgh F, Salomon DR,  
697 Ordoukhanian P: **Library construction for next-generation sequencing:**  
698 **overviews and challenges.** *BioTechniques* 2014, **56**(2):61-64, 66, 68, passim.
- 699 53. Luck AN, Anderson KG, McClung CM, VerBerkmoes NC, Foster JM, Michalski ML,  
700 Slatko BE: **Tissue-specific transcriptomics and proteomics of a filarial**  
701 **nematode and its Wolbachia endosymbiont.** *BMC genomics* 2015, **16**:920.
- 702 54. Bolger AM, Lohse M, Usadel B: **Trimmomatic: a flexible trimmer for Illumina**  
703 **sequence data.** *Bioinformatics* 2014, **30**(15):2114-2120.
- 704 55. Schmieder R, Edwards R: **Fast identification and removal of sequence**  
705 **contamination from genomic and metagenomic datasets.** *PloS one* 2011,  
706 **6**(3):e17288.

- 707 56. Schmieder R, Edwards R: **Quality control and preprocessing of metagenomic**  
708 **datasets.** *Bioinformatics* 2011, **27**(6):863-864.
- 709 57. Parks DH, Imelfort M, Skennerton CT, Hugenholtz P, Tyson GW: **CheckM: assessing**  
710 **the quality of microbial genomes recovered from isolates, single cells, and**  
711 **metagenomes.** *Genome research* 2015, **25**(7):1043-1055.
- 712 58. Rodriguez RL, Gunturu S, Harvey WT, Rossello-Mora R, Tiedje JM, Cole JR,  
713 Konstantinidis KT: **The Microbial Genomes Atlas (MiGA) webserver: taxonomic**  
714 **and gene diversity analysis of Archaea and Bacteria at the whole genome level.**  
715 *Nucleic Acids Res* 2018, **46**(W1):W282-W288.
- 716 59. Markowitz VM, Chen IM, Palaniappan K, Chu K, Szeto E, Grechkin Y, Ratner A, Jacob  
717 B, Huang J, Williams P *et al*: **IMG: the Integrated Microbial Genomes database**  
718 **and comparative analysis system.** *Nucleic acids research* 2012, **40**(Database  
719 issue):D115-122.
- 720 60. Cornish-Bowden A: **Current IUBMB recommendations on enzyme nomenclature**  
721 **and kinetics.** *Perspectives in Science* 2014, **1**(1):74-87.
- 722 61. Hyatt D, Chen GL, Locascio PF, Land ML, Larimer FW, Hauser LJ: **Prodigal:**  
723 **prokaryotic gene recognition and translation initiation site identification.** *BMC*  
724 *Bioinformatics* 2010, **11**:119.
- 725 62. Galperin MY, Makarova KS, Wolf YI, Koonin EV: **Expanded microbial genome**  
726 **coverage and improved protein family annotation in the COG database.** *Nucleic*  
727 *Acids Res* 2015, **43**(Database issue):D261-269.
- 728 63. Benedict MN, Henriksen JR, Metcalf WW, Whitaker RJ, Price ND: **ITEP: an**  
729 **integrated toolkit for exploration of microbial pan-genomes.** *BMC Genomics*  
730 2014, **15**:8.
- 731 64. van Dongen S, Abreu-Goodger C: **Using MCL to extract clusters from networks.**  
732 *Methods Mol Biol* 2012, **804**:281-295.
- 733 65. Ferguson TJ, Mah RA: **Isolation and characterization of an h(2)-oxidizing**  
734 **thermophilic methanogen.** *Appl Environ Microbiol* 1983, **45**(1):265-274.
- 735 66. Kumar S, Stecher G, Tamura K: **MEGA7: Molecular Evolutionary Genetics**  
736 **Analysis Version 7.0 for Bigger Datasets.** *Mol Biol Evol* 2016, **33**(7):1870-1874.
- 737 67. Thompson JD, Higgins DG, Gibson TJ: **CLUSTAL W: improving the sensitivity of**  
738 **progressive multiple sequence alignment through sequence weighting,**  
739 **position-specific gap penalties and weight matrix choice.** *Nucleic acids research*  
740 1994, **22**(22):4673-4680.
- 741

742

743 **Table 1.** Summary of 35 *Akkermansia* metagenome assembled genomes (MAGs) recovered from a diverse population of children  
744 aged 2-9 years living in Los Angeles, CA, USA. The genome of *A. muciniphila* Muc<sup>T</sup> was not included in the averages presented at  
745 the bottom of the table

| Genome name                            | Phylogroup | Genome Properties |                   |                    |                    | Assembly Properties |              |                |
|----------------------------------------|------------|-------------------|-------------------|--------------------|--------------------|---------------------|--------------|----------------|
|                                        |            | Completeness (%)  | Contamination (%) | Predicted Proteins | Coding Density (%) | Contigs             | Length (Mbp) | GC Content (%) |
| <i>A. muciniphila</i> Muc <sup>T</sup> | AmI        | 100               | 0.0               | 2,238              | 88.6               | 1                   | 2.66         | 55.8           |
| CDI-75C-7                              | AmI        | 95.5              | 0.0               | 2,433              | 88.4               | 26                  | 2.82         | 55.5           |
| CDI-92A-19                             | AmI        | 68.5              | 0.0               | 2,117              | 89.0               | 317                 | 2.27         | 55.8           |
| CDI-93C-15                             | AmI        | 91.0              | 0.0               | 2,345              | 88.8               | 231                 | 2.59         | 55.8           |
| CDI-16B-22                             | AmI        | 94.6              | 0.0               | 2,291              | 88.5               | 79                  | 2.65         | 55.6           |
| CDI-158B-12                            | AmI        | 95.5              | 0.0               | 2,302              | 88.2               | 42                  | 2.70         | 55.3           |
| CDI-50B-13                             | AmI        | 95.5              | 0.0               | 2,293              | 88.4               | 22                  | 2.72         | 55.6           |
| CDI-51A-11                             | AmI        | 95.5              | 0.0               | 2,295              | 88.4               | 22                  | 2.72         | 55.6           |
| CDI-28A-8                              | AmI        | 95.5              | 0.0               | 2,301              | 88.2               | 27                  | 2.71         | 55.4           |
| CDI-85A-12                             | AmI        | 95.5              | 0.0               | 2,225              | 88.4               | 19                  | 2.66         | 55.4           |
| CDI-30A-11                             | AmI        | 95.5              | 0.0               | 2,272              | 88.4               | 22                  | 2.68         | 55.5           |
| CDI-42C-15                             | AmI        | 95.5              | 0.0               | 2,340              | 88.4               | 25                  | 2.74         | 55.2           |
| CDI-151B-10                            | AmI        | 94.6              | 0.0               | 2,383              | 88.3               | 64                  | 2.77         | 55.4           |
| CDI-193A-6                             | AmI        | 95.5              | 0.0               | 2,416              | 88.3               | 32                  | 2.83         | 55.4           |
| CDI-143C-7                             | AmII       | 81.1              | 0.9               | 2,301              | 88.4               | 206                 | 2.67         | 58.7           |
| CDI-10B-12                             | AmII       | 94.6              | 0.0               | 2,439              | 88.1               | 32                  | 2.98         | 58.3           |
| CDI-128B-11                            | AmII       | 92.8              | 0.0               | 2,428              | 88.1               | 22                  | 2.96         | 58.3           |
| CDI-129B-12                            | AmII       | 88.3              | 0.0               | 2,375              | 88.1               | 229                 | 2.70         | 58.5           |
| CDI-77C-9                              | AmII       | 95.5              | 0.0               | 2,435              | 88.0               | 25                  | 2.99         | 58.2           |
| CDI-24B-9                              | AmII       | 94.6              | 0.0               | 2,450              | 88.2               | 31                  | 3.02         | 58.1           |
| CDI-182B-6                             | AmII       | 95.5              | 0.0               | 2,478              | 88.1               | 22                  | 3.02         | 58.3           |
| CDI-198C-9                             | AmII       | 95.5              | 0.0               | 2,512              | 88.3               | 51                  | 3.00         | 58.2           |
| CDI-69C-9                              | AmII       | 95.5              | 0.0               | 2,421              | 88.2               | 24                  | 2.96         | 58.2           |
| CDI-138A-11                            | AmII       | 95.5              | 0.0               | 2,483              | 88.0               | 25                  | 3.01         | 58.2           |
| CDI-70C-8                              | AmII       | 95.5              | 0.0               | 2,481              | 88.0               | 32                  | 3.01         | 58.2           |
| CDI-26A-8                              | AmII       | 92.8              | 0.9               | 2,610              | 88.1               | 251                 | 2.95         | 58.0           |
| CDI-34A-8                              | AmII       | 95.5              | 0.0               | 2,558              | 87.2               | 29                  | 3.09         | 57.8           |
| CDI-65B-6                              | AmII       | 87.4              | 0.0               | 2,538              | 87.4               | 55                  | 3.04         | 57.8           |
| CDI-203B-7                             | AmII       | 94.6              | 0.9               | 2,479              | 87.8               | 25                  | 2.99         | 58.1           |
| CDI-150B-9                             | AmIV       | 95.5              | 0.0               | 2,457              | 87.7               | 29                  | 2.99         | 57.2           |
| CDI-12C-16                             | AmIV       | 95.5              | 0.0               | 2,461              | 87.8               | 32                  | 2.99         | 57.2           |
| CDI-156A-7                             | AmIV       | 95.5              | 0.9               | 2,532              | 87.5               | 56                  | 3.05         | 56.7           |
| CDI-74B-7                              | AmIV       | 94.6              | 0.9               | 2,502              | 87.4               | 48                  | 3.01         | 56.7           |

|                |          |             |            |                |             |              |             |              |
|----------------|----------|-------------|------------|----------------|-------------|--------------|-------------|--------------|
| CDI-18B-8      | AmIV     | 94.6        | 0.0        | 2,509          | 88.0        | 124          | 2.95        | 56.9         |
| CDI-148A-8     | AmIV     | 95.5        | 0.9        | 2,557          | 87.3        | 46           | 3.04        | 56.0         |
| CDI-13A-11     | AmIV     | 95.5        | 0.0        | 2,670          | 88.1        | 66           | 3.20        | 56.6         |
| <b>AVERAGE</b> | <b>-</b> | <b>93.4</b> | <b>0.2</b> | <b>2,419.7</b> | <b>88.1</b> | <b>68.23</b> | <b>2.87</b> | <b>56.9%</b> |

746 **Table 2.** Presence of select corrin ring biosynthesis associated genes in CSUN *Akkermansia*  
 747 isolates as determined by PCR.

| Isolate                            | Phylogroup | <i>cbiL</i> | <i>cbiC</i> | <i>cbiD</i> | <i>cbiFGH</i> |
|------------------------------------|------------|-------------|-------------|-------------|---------------|
| CSUN-7                             | AmI        | -           | -           | -           | -             |
| CSUN-12                            | AmI        | -           | -           | -           | -             |
| CSUN-17                            | AmII       | +           | +           | +           | +             |
| CSUN-23                            | AmI        | -           | -           | -           | -             |
| CSUN-27                            | AmI        | -           | -           | -           | -             |
| CSUN-28                            | AmI        | -           | -           | -           | -             |
| CSUN-33                            | AmI        | -           | -           | -           | -             |
| CSUN-34                            | AmII       | +           | +           | +           | +             |
| CSUN-31                            | AmI        | -           | -           | -           | -             |
| CSUN-36                            | AmI        | -           | -           | -           | -             |
| <i>A. muciniphila</i> ATCC BAA-835 | AmI        | -           | -           | -           | -             |
| <i>A. glycaniphila</i> ERS 1290231 | NA         | +           | +           | +           | +             |

748 (+) indicates PCR product of predicted amplicon size.  
 749



750 **Supplemental Table 1.** Corrin ring biosynthesis degenerate primers.

| Gene          | Gene length (bp) | Primer name         | Primer 5'-3'         | Expected amplicon size (bp) |
|---------------|------------------|---------------------|----------------------|-----------------------------|
| <i>cbiL</i>   | 708              | precorrin-2 Forward | TYTTCAGCATGTCSCGYGAC | 358                         |
| <i>cbiL</i>   | 708              | precorrin-2 Reverse | GCGGCTRCGGTAGGTYTT   | 358                         |
| <i>cbiC</i>   | 663              | <i>cbiC</i> Forward | ATCCACACCACGGCRGAC   | 500                         |
| <i>cbiC</i>   | 663              | <i>cbiC</i> Reverse | GGCGTGCAGGGTRGT      | 500                         |
| <i>cbiFGH</i> | 2619             | <i>cbiG</i> Forward | GTSAGCAGCGTYTTYG     | 340                         |
| <i>cbiFGH</i> | 2619             | <i>cbiG</i> Reverse | ATGAGSGCCTGCCCKCCGA  | 340                         |
| <i>cbiD</i>   | 1119             | <i>cbiD</i> Forward | GACCCSGACTGCACSCA    | 379                         |
| <i>cbiD</i>   | 1119             | <i>cbiD</i> Reverse | TAGGCTTCRTGGCTG      | 379                         |

751 Y=C or T, S=C or G, B=G or T or C, R=G or A

752

753 **Supplemental Table 2.** Corrin ring biosynthesis sequenced amplicons from CSUN-17 homology  
 754 to *A. glycaniphila* and *Desulfovibrio vulgaris*.

| Gene name     | <i>A. glycaniphila</i> gene name <sup>a</sup>                                | Percent identity to <i>A. glycaniphila</i> <sup>b</sup> | <i>Desulfovibrio vulgaris</i> gene name <sup>a</sup> | Percent identity to <i>Desulfovibrio vulgaris</i> <sup>b</sup> |
|---------------|------------------------------------------------------------------------------|---------------------------------------------------------|------------------------------------------------------|----------------------------------------------------------------|
| <i>cbiL</i>   | precorrin-2 C20-methyltransferase<br>/cobalt-factor II C20-methyltransferase | 65%                                                     | precorrin-2 C20-methyltransferase                    | 48%                                                            |
| <i>cbiC</i>   | precorrin-8X methylmutase                                                    | 80%                                                     | precorrin-8X methylmutase                            | 49%                                                            |
| <i>cbiD</i>   | cobalt-precorrin-5B (C1)-methyltransferase                                   | 70%                                                     | cobalamin biosynthesis protein CbiD                  | 46%                                                            |
| <i>cbiFGH</i> | cobalt-precorrin 5A hydrolase/precorrin-3B C17-methyltransferase             | 56%                                                     | precorrin-4 C11-methyltransferase                    | 32%                                                            |

755 <sup>a</sup>IMG/ER gene names using BLASTx against *A. glycaniphila* ERS 1290231 and *Desulfovibrio vulgaris*

756 (Hildenborough)

757 <sup>b</sup>Percent identity of CSUN-17 sequence using BLASTx against *A. glycaniphila* ERS 1290231 and *Desulfovibrio*

758 *vulgaris* (Hildenborough)

759

760

761

762

763

764

765

766

767

768

769

770

771

772

773

774

775

776

777

778

779

780

781 **Supplemental Table 3.** Demographic information of individuals who provided fecal samples  
782 from which strains of *Akkermansia* were isolated.

| <b>Isolate</b> | <b>Phylogroup</b> | <b>Age</b> | <b>Gender</b> | <b>Ethnicity</b> | <b>Diet</b> |
|----------------|-------------------|------------|---------------|------------------|-------------|
| CSUN-7         | AmI               | 63 years   | Male          | Caucasian        | Omnivore    |
| CSUN-12        | AmI               | 22 years   | Male          | Hispanic         | Omnivore    |
| CSUN-17        | AmII              | 32 years   | Male          | Caucasian        | Omnivore    |
| CSUN-23        | AmI               | 27 years   | Male          | Caucasian        | Omnivore    |
| CSUN-27        | AmI               | 28 years   | Male          | Caucasian        | Omnivore    |
| CSUN-28        | AmI               | 33 years   | Male          | Hispanic         | Omnivore    |
| CSUN-31        | AmI               | 23 years   | Female        | Hispanic         | Vegan       |
| CSUN-33        | AmI               | 22 years   | Male          | Hispanic         | Vegetarian  |
| CSUN-34        | AmII              | 22 years   | Male          | Hispanic         | Omnivore    |
| CSUN-36        | AmI               | 39 years   | Female        | Caucasian        | Omnivore    |

783

784 **Supplemental Table 4:** Locus tags of sequences used for corrin ring biosynthesis degenerate  
 785 primer design.

| <b>Gene</b> | <b>Locus tag</b>                                                                                                                                                                                                                                                                                                                                                          |
|-------------|---------------------------------------------------------------------------------------------------------------------------------------------------------------------------------------------------------------------------------------------------------------------------------------------------------------------------------------------------------------------------|
| <i>cbiL</i> | Ga0175004_112520<br>T370DRAFT_00397<br>Ga0256628_10023618<br>Ga0257029_1018451<br>Ga0257030_10082613<br>Ga0257062_100012256<br>Ga0257032_118796<br>Ga0257040_100005132<br>Ga0257041_10019915<br>Ga0257042_100005192<br>Ga0257043_10000156<br>Ga0257044_106873<br>Ga0257047_1015355<br>Ga0257051_1033411<br>Ga0257052_10000756<br>Ga0257053_10015516<br>Ga0257060_10006251 |
| <i>cbiC</i> | Ga0175004_112518<br>DESPIG_00351<br>Ga0256628_10023616<br>Ga0257029_1018453<br>Ga0257030_10082611<br>Ga0257062_100012254<br>Ga0257032_118794<br>Ga0257040_100005134<br>Ga0257041_10019913<br>Ga0257042_100005190<br>Ga0257043_10000158<br>Ga0257044_106871<br>Ga0257047_1015357<br>Ga0257051_1033413<br>Ga0257052_10000758<br>Ga0257053_10015514<br>Ga0257060_10006249    |
| <i>cbiG</i> | Ga0175004_112515<br>HMPREF0179_00024<br>Ga0256628_10023613<br>Ga0257029_1018456<br>Ga0257030_1008268                                                                                                                                                                                                                                                                      |

|             |                                                                                                                                                                                                                                                                                                                                                                            |
|-------------|----------------------------------------------------------------------------------------------------------------------------------------------------------------------------------------------------------------------------------------------------------------------------------------------------------------------------------------------------------------------------|
|             | Ga0257062_100012251<br>Ga0257032_118791<br>Ga0257040_100005137<br>Ga0257041_10019910<br>Ga0257042_100005187<br>Ga0257043_10000161<br>Ga0257044_108973<br>Ga0257047_1015360<br>Ga0257051_1033416<br>Ga0257052_10000761<br>Ga0257053_10015511<br>Ga0257060_10006246                                                                                                          |
| <i>cbiD</i> | Ga0175004_112517<br>HMPREF0178_02483<br>Ga0256628_10023615<br>Ga0257029_1018454<br>Ga0257030_10082610<br>Ga0257062_100012253<br>Ga0257032_118793<br>Ga0257040_100005135<br>Ga0257041_10019912<br>Ga0257042_100005189<br>Ga0257043_10000159<br>Ga0257044_108971<br>Ga0257047_1015358<br>Ga0257051_1033414<br>Ga0257052_10000759<br>Ga0257053_10015513<br>Ga0257060_10006248 |

786  
787  
788  
789  
790  
791  
792  
793  
794  
795  
796  
797  
798  
799  
800  
801

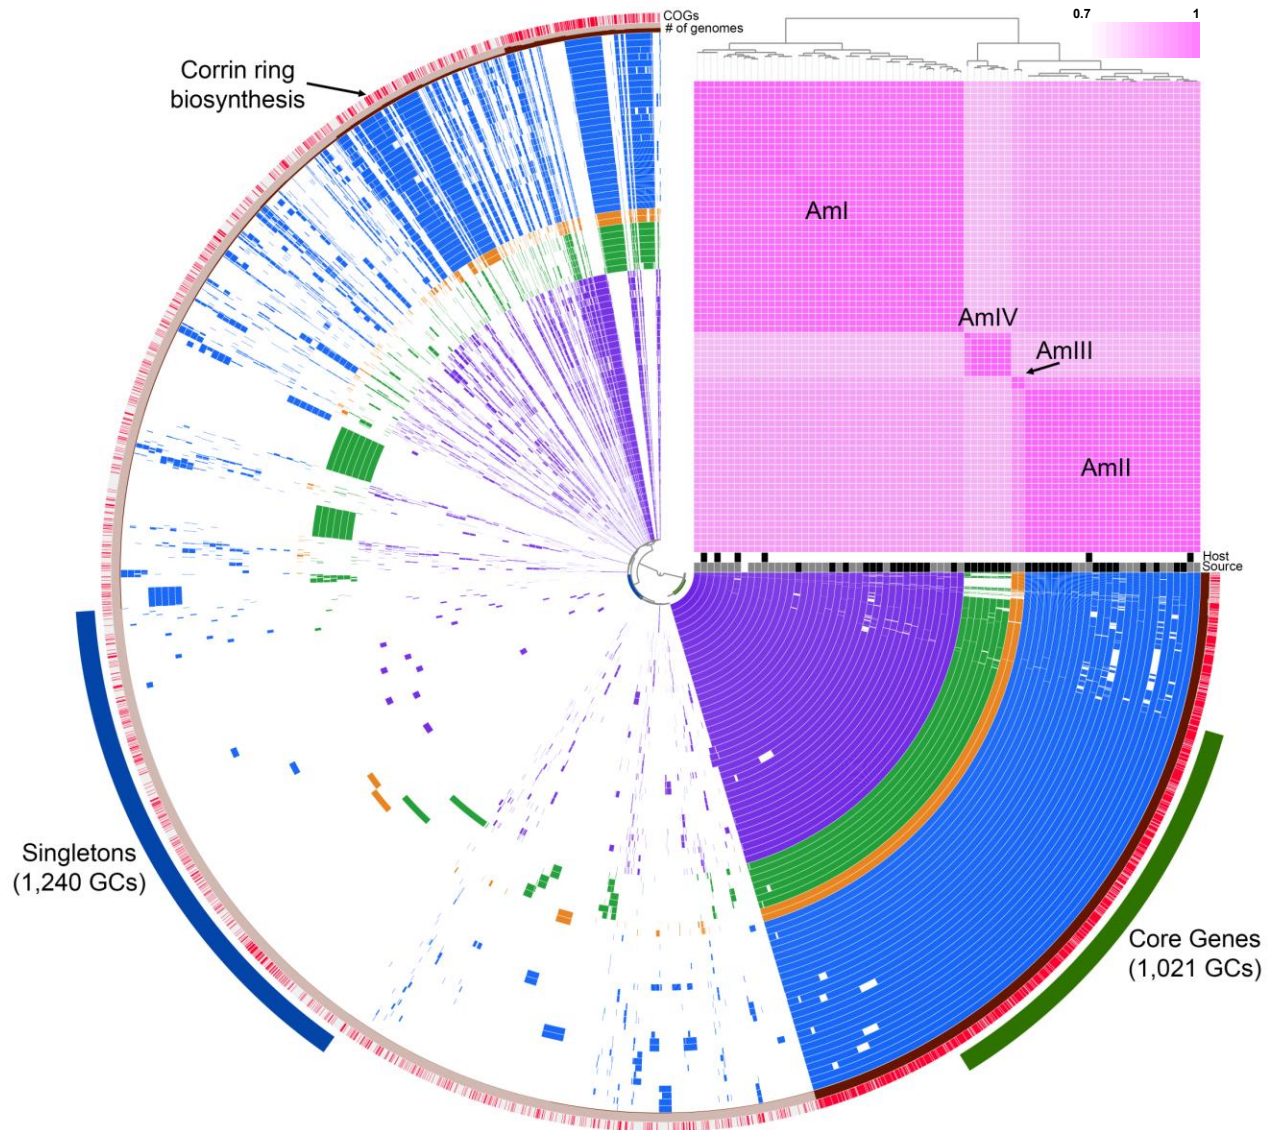

802  
803  
804  
805  
806  
807  
808  
809  
810  
811  
812  
813  
814  
815  
816  
817

**A**

|       | <i>cbiKX</i> | <i>cbiL</i> | hypothetical | <i>cbiC</i> | <i>cbiD</i> | <i>cbiET</i> | <i>cbiFGH</i> | <i>cbiA</i> | <i>cobA</i> |
|-------|--------------|-------------|--------------|-------------|-------------|--------------|---------------|-------------|-------------|
| AmI   | 0/40         | 0/40        | 0/40         | 0/40        | 0/40        | 0/40         | 0/40          | 0/40        | 0/40        |
| AmII  | 24/26        | 24/26       | 24/26        | 24/26       | 24/26       | 24/26        | 24/26         | 24/26       | 24/26       |
| AmIII | 2/2          | 2/2         | 2/2          | 2/2         | 2/2         | 2/2          | 2/2           | 2/2         | 2/2         |
| AmIV  | 0/7          | 0/7         | 0/7          | 0/7         | 0/7         | 0/7          | 0/7           | 0/7         | 0/7         |

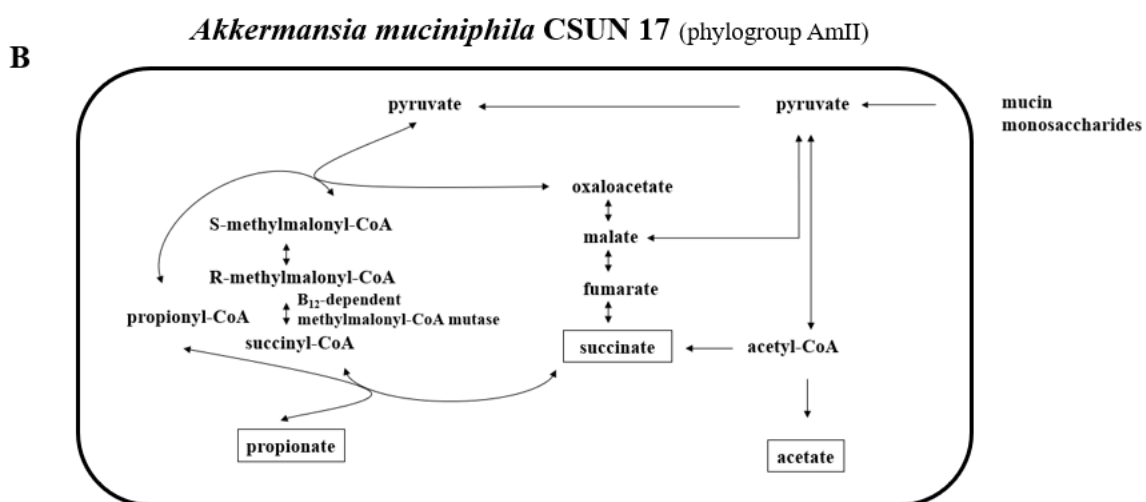

818  
819  
820  
821  
822  
823  
824  
825  
826  
827  
828  
829  
830  
831  
832  
833  
834  
835  
836  
837  
838  
839  
840  
841  
842

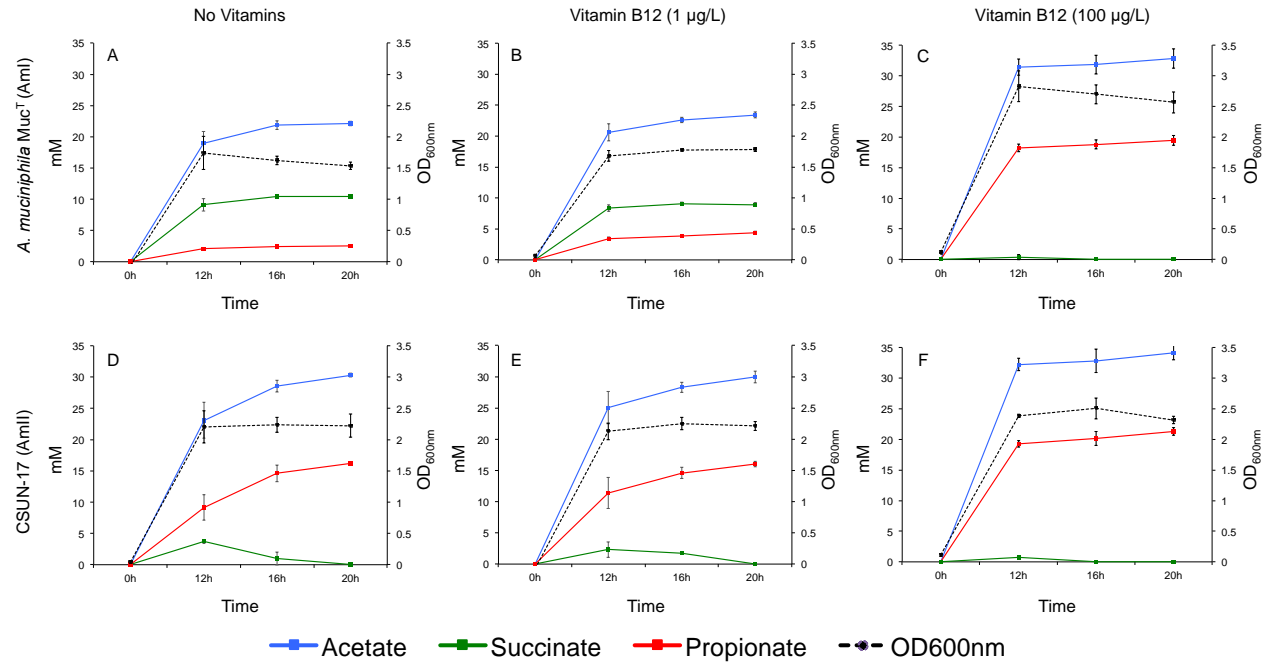

843
